# Supplementary material for: Dependence of Brain Intravoxel Incoherent Motion Perfusion Parameters on the Cardiac Cycle
Source: PubMed Central journal article supplement (PMC3758329; doi:10.1371/journal.pone.0072856), 2013-08-30
Supplement: pone.0072856.s001.pdf [file pone.0072856.s001.pdf]

## Time Dependent Diffusion in Pulsed Gradients

We consider diffusing particles with time-dependent pseudo-diffusion constant  $D^*(t)$ , as arises, e.g., in a fluid pushed through a randomly bifurcating network of capillaries with time-dependent speed. The particles are subject to magnetic field diffusion gradients  $g(t)$ . The fraction of spin echo signal with and without diffusion gradients is

$$\frac{S(g(t), t)}{S_0} = \left| \overline{e^{i\phi_j(t)}} \right|^2, \quad (1)$$

where

$$\phi_j(t) = \gamma \int_0^t g(t') r_j(t') dt' = \gamma \int_0^t g(t') \int_0^{t'} v_j(t'') dt'' dt' \quad (2)$$

is the phase accumulated by particle  $j$ , and  $\overline{(\dots)}$  is the ensemble average over the particles  $j$ , whose co-ordinate  $r_j$  undergoes pseudo-diffusion.

$\phi$  is a Gaussian variable, since the particle velocities  $v_j(t)$  are Gaussian, satisfying

$$\overline{v_j(t)v_j(t')} = D^*(t)\delta(t-t'), \quad (3)$$

and

$$D^*(t) \approx v_{\text{blood}}(t)l_{\text{cap}}, \quad (4)$$

where  $l_{\text{cap}}$  is a typical length of a capillary segment between two bifurcations and  $v_{\text{blood}}(t)$  is the instantaneous speed of the flow within a capillary.

It is then straightforward to evaluate the Gaussian

$$\frac{S(g(t), t)}{S_0} = \exp \left[ -\overline{\phi_j(t)^2} \right] = \exp \left[ -\gamma^2 \int_0^t dt' \int_0^t dt'' g(t')g(t'') \int_0^{\min(t', t'')} dt''' D^*(t''') \right]. \quad (5)$$

In the special case of the Stejskal-Tanner sequence,  $g(t)$  consists of two short pulses of duration  $\delta$ , the first one around  $t_1$  with amplitude  $G > 0$ , and the second one around  $t_2 \equiv t_1 + \Delta$  with amplitude  $-G$ . In this case one obtains

$$\frac{S(t_1)}{S_0} \approx \exp \left[ -\gamma^2 \delta^2 G^2 \int_{t_1}^{t_1+\Delta} D^*(t) dt \right]. \quad (6)$$

This is minimized by maximizing the value of  $\int_{t_1}^{t_1+\Delta} D^*(t) dt$ . If  $D^*(t)$  is symmetric with respect to the blood flow peak time  $t_0$ , the maximum dephasing will be achieved when  $t_1$  and  $t_1 + \Delta$  are chosen symmetrically with respect to  $t_0$  as well. If  $D^*$  is constant and  $\delta$  is very short, the exponent reduces to Eq. (2) in the main text. For each time  $\tilde{t}$ , an effective  $D_{\text{eff}}^*(\tilde{t})$  can be obtained by averaging  $D^*(t)$  over  $\Delta$ :

$$D_{\text{eff}}^*(\tilde{t}) = \frac{1}{\Delta} \int_{\tilde{t}-\frac{\Delta}{2}}^{\tilde{t}+\frac{\Delta}{2}} D^*(t) dt. \quad (7)$$
